# Supplementary material for: Mapping global inputs and impacts from of human sewage in coastal ecosystems
Source: PubMed Central journal article supplement (PMC8580218; doi:10.1371/journal.pone.0258898), 2021-11-10
Supplement: pone.0258898.s001.pdf [file pone.0258898.s001.pdf]

## S1 File

# **Supporting Information for: Mapping global inputs and impacts from of human sewage in coastal ecosystems**

## S1 Text

Throughout our process, we compared intermediate results to previously-reported literature to ensure that our approach is within probable bounds. We performed two main types of comparisons. The first step is to corroborate that our national-level sanitation factors accurately represent the spatial distribution of these values. For that, we compared spatially explicit and anonymized measurements reported by USAID Domestic Household Surveys (DHS) to our WHO-derived estimates. These results are shown in Fig. S5.

We then benchmarked our pourpoint-level effluent against in situ measurements of annual N effluent in 83 rivers across the world from the Global Nutrient Export from Watersheds 2 (NEWS2) [1]. The NEWS2 model uses in situ measurements to calibrate their model; these data report position (longitude, latitude) and total N effluent ( $\text{Kg N yr}^{-1}$ ). Our pourpoint-level analysis required us to assign more than one pourpoint to a given river mouth. Therefore, we used different buffer sizes around the reported river mouths (0.1, 0.25, 0.5, and 1 degree), and attributed all pourpoints within this buffer to the river. We then summed total N from all pourpoints to obtain river-level estimates (Fig. S6).

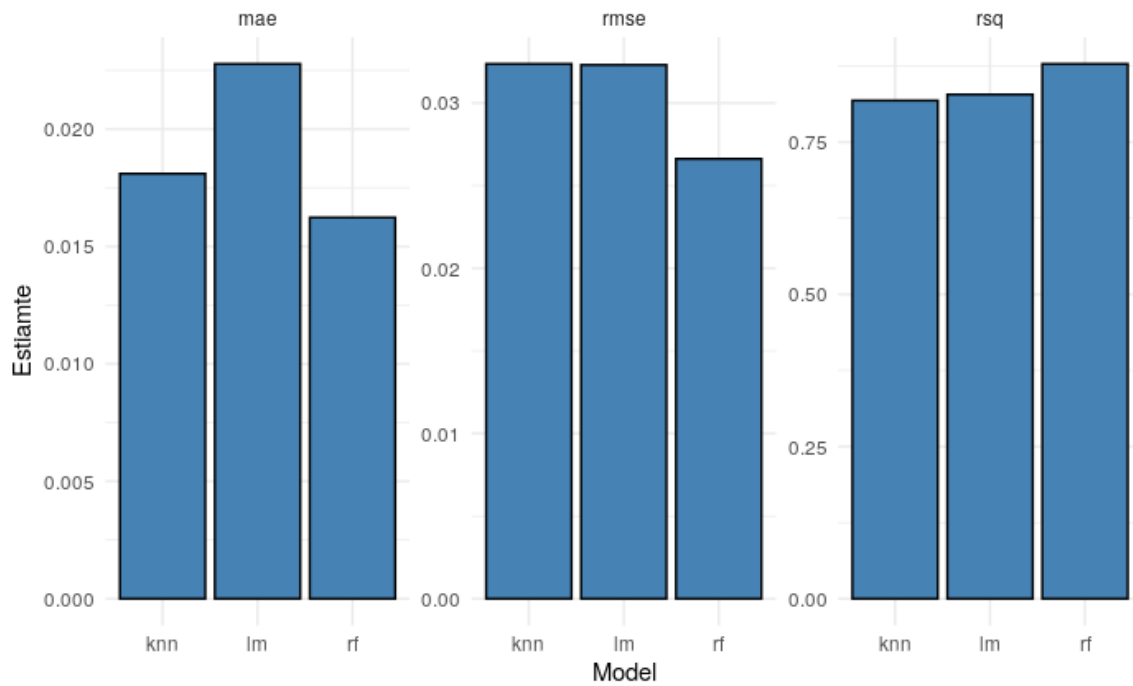

**S1 Fig.** Model performance based on a 70/30 data split for training and testing. The x-axis shows three model types (K-nearest neighbors, linear model, and random forest), with the y-axis showing the out-of-sample estimate of different performance indicators. Panels show the Mean Absolute Error (mae), the Root-Mean-Squared Error (rmse), and the R squared (rsq). The random forest has the lowest out-of-sample errors, and the highest out-of-sample R-squared.

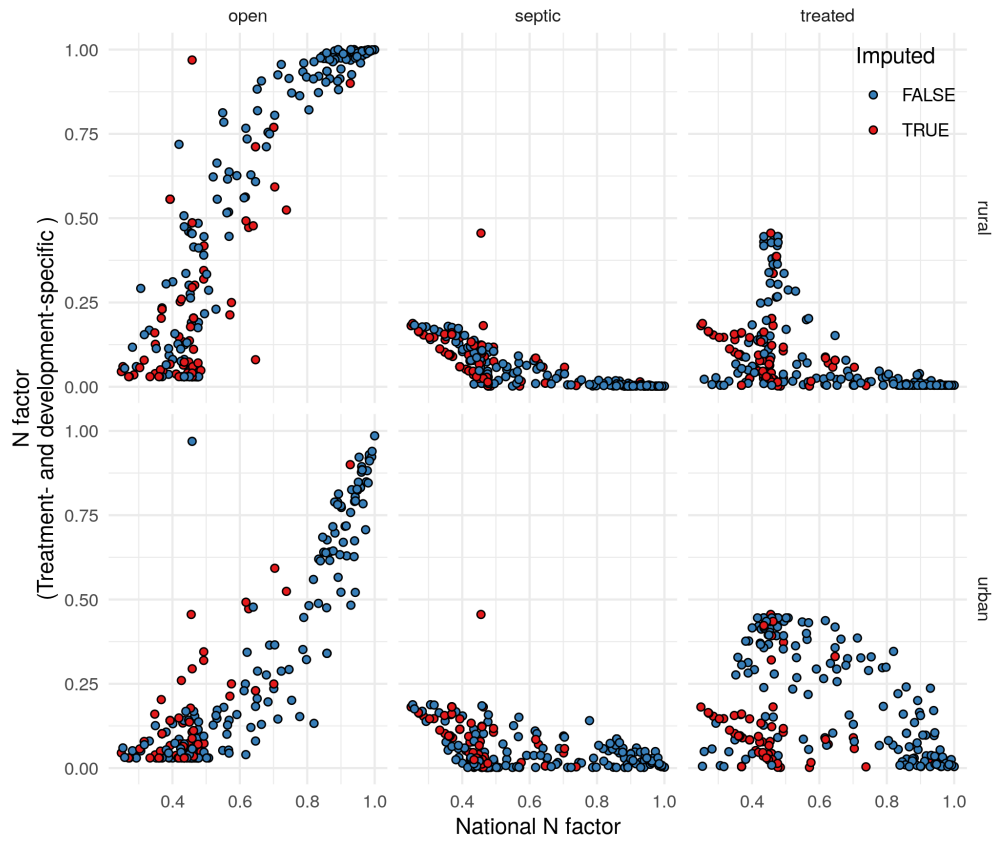

**S2 Fig.** Comparison of rural- and urban-level nitrogen factors for each country and treatment time versus aggregate national-level values. The WHO-UNICEF data contain information that aggregates access to sanitation types at the national level, and for some countries it distinguishes between rural and urban areas.

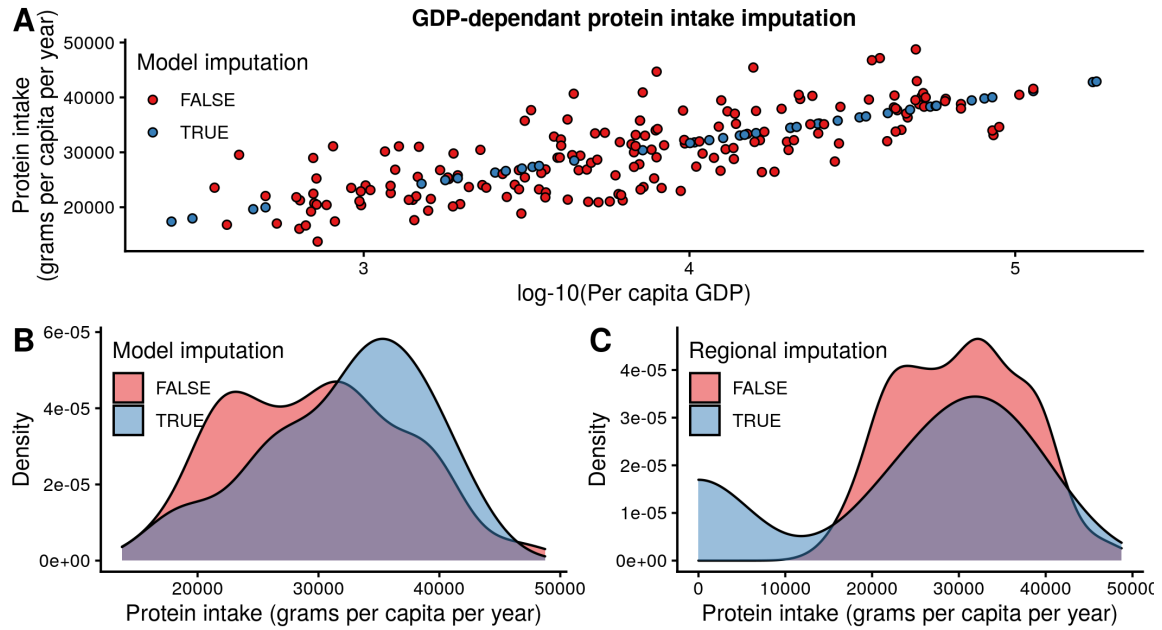

**S3 Fig.** Imputation of protein intake as a function of per capita GDP. A) The relationship between log-transformed per capita GDP and protein intake for each country for which data are known (red; not modeled and thus model imputation is false) and imputed (blue; modeled and thus true). Density distribution plots for known and imputed protein intake values at the B) country or C) geopolitical region means.

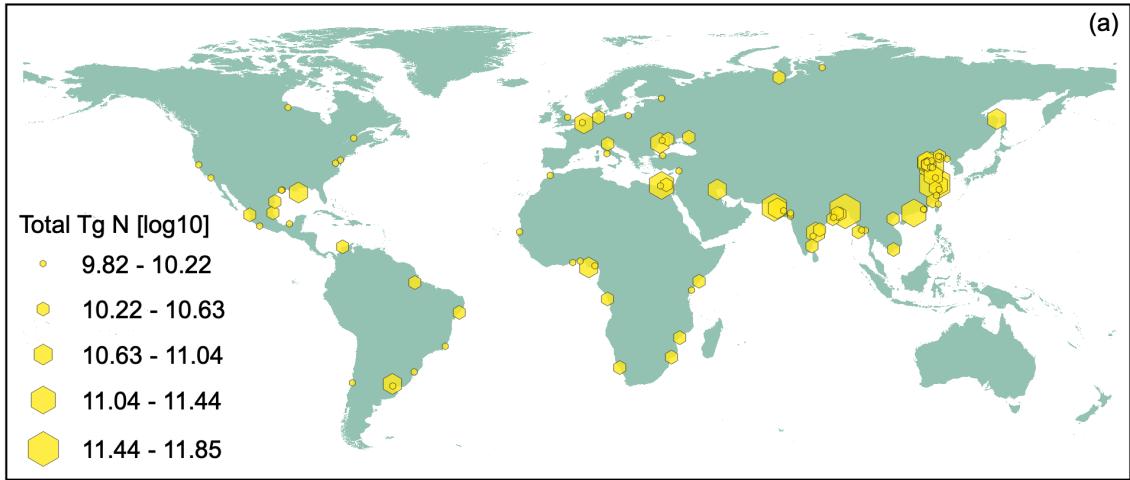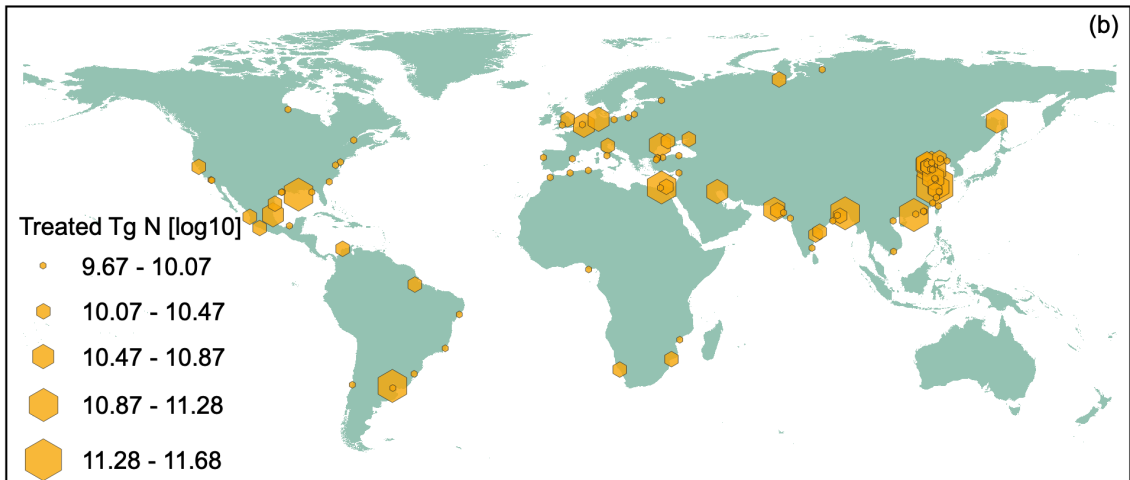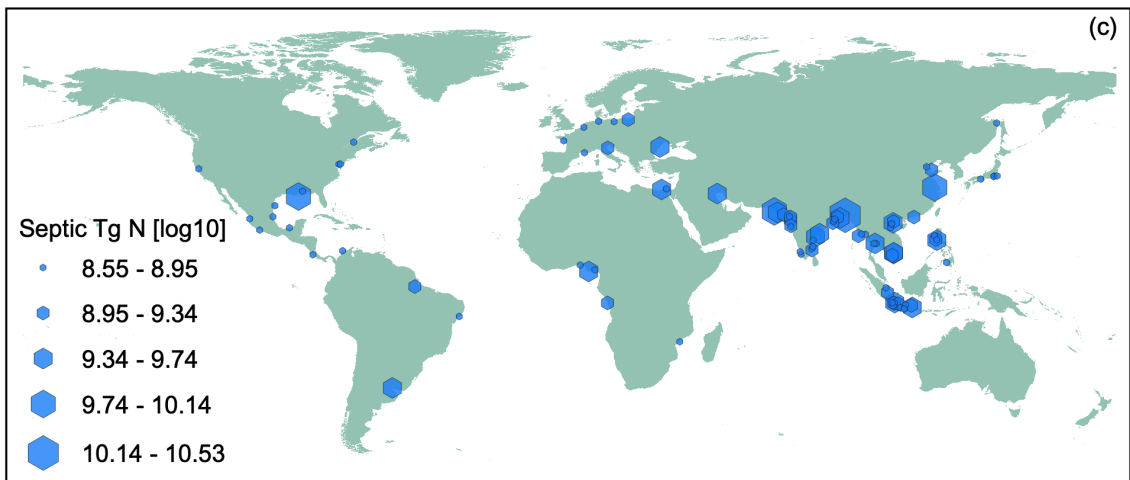

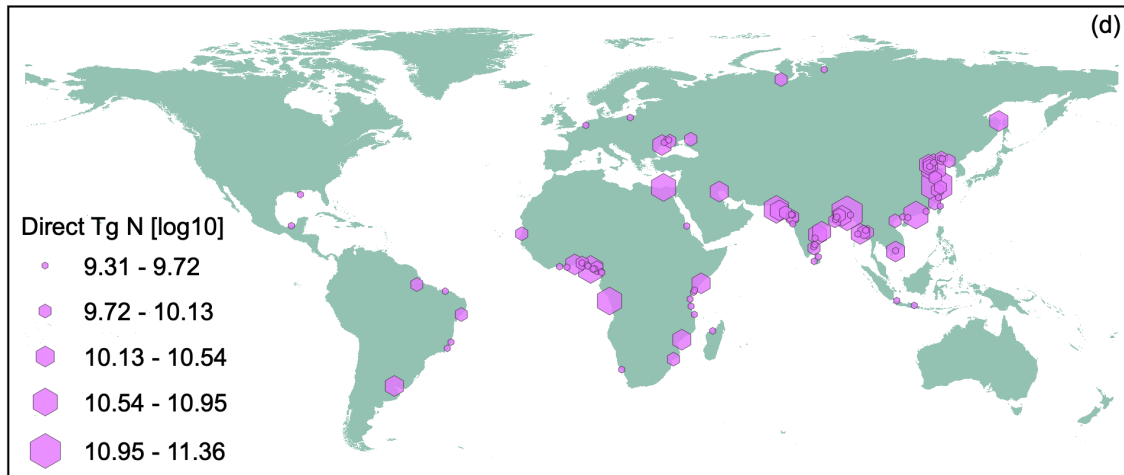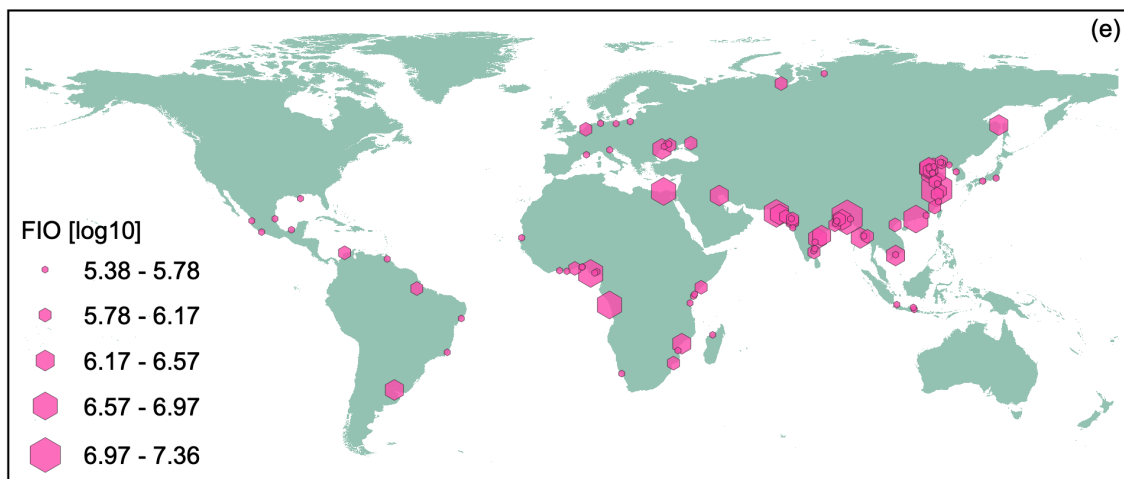

**S4 Fig.** Coastal pourpoint locations of the top 100 watersheds for wastewater inputs globally for (a) total N (yellow), (b) treated (orange), (c) septic (blue), (d) direct (purple), and (e) and FIO inputs globally (pink). Note that FIO estimates are unitless.

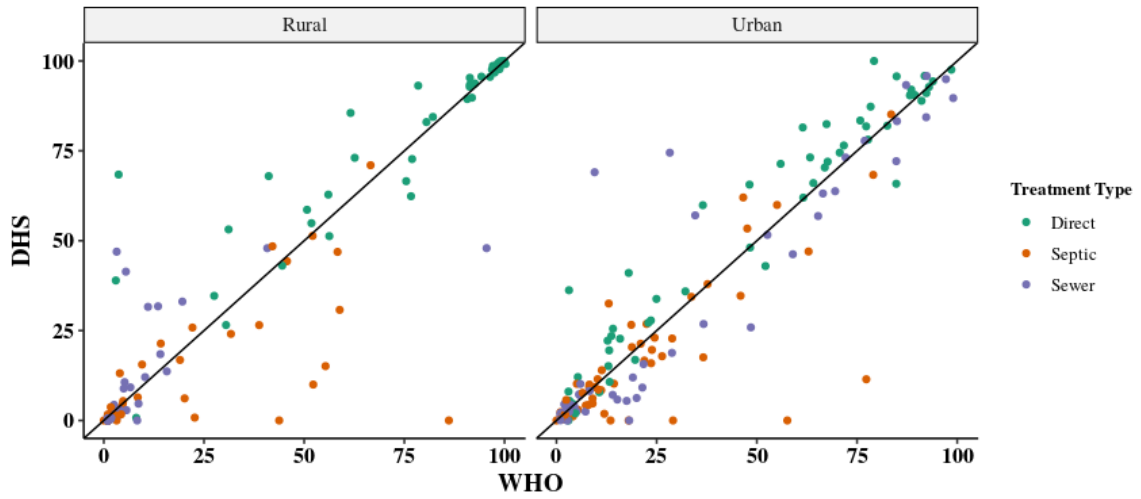

**S5 Fig.** Comparison of wastewater treatment types (direct, septic, sewer) between the WHO and DHS survey datasets for rural and urban settings.

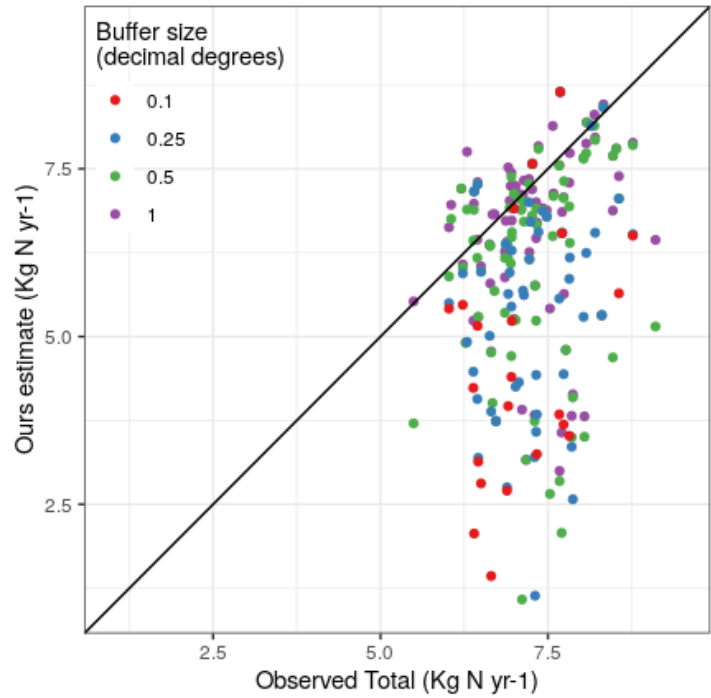

**S6 Fig.** Comparison of observed N and estimated N for 83 rivers in the world for four buffer sizes (colors). Each point represents one river and buffer size, and the dark line indicates a 1:1 correspondence. Values above the line represent modeled values that are greater than *in situ* measured values. Different buffer sizes have little effect on the estimated N.



| Treatment category | JMP listing                                                          |
|--------------------|----------------------------------------------------------------------|
| Direct             | Unimproved<br>Open defecation<br>Including shared latrines and other |
| Septic             | Including shared septic tanks                                        |
| Treated            | Including shared sewer connections                                   |

**S1 Table** Treatment facility categories used in this paper and the corresponding categories from the original JMP data. For a given pixel, the units of these categories are the proportion of the rural or urban population using that facility. When added together they sum to 100%.

| Independent Variable   | Dependent Variable                                        |
|------------------------|-----------------------------------------------------------|
|                        | Per capita protein consumption<br>(grams / person / year) |
| log10 (Per capita GDP) | 8,983.259*** (584.407)                                    |
| Constant               | -4,261.140* (2,245.397)                                   |
| Observations           | 174                                                       |
| R <sup>2</sup>         | 0.579                                                     |
| Residual Std. Error    | 4,760.402 (df = 172)                                      |
| F Statistic            | 236.285*** (df = 1; 172)                                  |
| <i>Note:</i>           | *p<0.1; **p<0.05; ***p<0.01                               |

**S2 Table** Coefficient estimates for protein consumption as a function of per capita gdp (log-10 transformed). These coefficients were used to impute protein consumption for 37 countries, shown in Extended Data Fig. 3.

| ISO3 | Region             | Source of Imputation            | Protein consumption<br>(grams per person per<br>year) |
|------|--------------------|---------------------------------|-------------------------------------------------------|
| ABW  | Caribbean          | GDP model                       | 35250.61                                              |
| AIA  | Caribbean          | Geopolitical regional<br>median | 30426.4                                               |
| ALA  | Northern Europe    | Geopolitical regional<br>median | 39949.25                                              |
| AND  | Southern Europe    | GDP model                       | 37141.02                                              |
| ASM  | Polynesia          | GDP model                       | 32218.99                                              |
| ATA  | NA                 | Geopolitical regional<br>median | 0                                                     |
| ATF  | Eastern Africa     | Geopolitical regional<br>median | 20916.33                                              |
| BDI  | Eastern Africa     | GDP model                       | 17387.55                                              |
| BES  | Caribbean          | Geopolitical regional<br>median | 30426.4                                               |
| BHR  | Western Asia       | GDP model                       | 35206.6                                               |
| BLM  | Caribbean          | Geopolitical regional<br>median | 30426.4                                               |
| BTN  | Southern Asia      | GDP model                       | 26313.08                                              |
| BVT  | NA                 | Geopolitical regional<br>median | 0                                                     |
| CCK  | South-Eastern Asia | Geopolitical regional<br>median | 24557.2                                               |
| COD  | Middle Africa      | GDP model                       | 19641.8                                               |
| COK  | Polynesia          | Geopolitical regional<br>median | 33284.35                                              |
| COM  | Eastern Africa     | GDP model                       | 24283.29                                              |
| CPT  | NA                 | Geopolitical regional<br>median | 0                                                     |
| CUW  | Caribbean          | GDP model                       | 34465.36                                              |
| CXR  | South-Eastern Asia | Geopolitical regional<br>median | 24557.2                                               |
| CYM  | Caribbean          | GDP model                       | 39454.83                                              |
| ERI  | Eastern Africa     | Geopolitical regional<br>median | 20916.33                                              |
| ESH  | Northern Africa    | Geopolitical regional<br>median | 35744.45                                              |
| ETH  | Eastern Africa     | GDP model                       | 19980.75                                              |
| FLK  | South America      | Geopolitical regional<br>median | 26997.22                                              |
| FRO  | Northern Europe    | GDP model                       | 38312.37                                              |

|     |                           |                              |          |
|-----|---------------------------|------------------------------|----------|
| GGY | Northern Europe           | Geopolitical regional median | 39949.25 |
| GIB | Southern Europe           | Geopolitical regional median | 38943.68 |
| GLP | Caribbean                 | Geopolitical regional median | 30426.4  |
| GNQ | Middle Africa             | GDP model                    | 34450.5  |
| GRL | Northern America          | GDP model                    | 37753.73 |
| GUF | South America             | Geopolitical regional median | 26997.22 |
| GUM | Micronesia                | GDP model                    | 36361.09 |
| HMD | NA                        | Geopolitical regional median | 0        |
| IMN | Northern Europe           | GDP model                    | 39805.58 |
| IOT | Southern Asia             | Geopolitical regional median | 22947.55 |
| JEY | Northern Europe           | Geopolitical regional median | 39949.25 |
| LBY | Northern Africa           | GDP model                    | 31811.31 |
| LIE | Western Europe            | GDP model                    | 42794.9  |
| LUX | Western Europe            | GDP model                    | 41153.5  |
| MAF | Caribbean                 | Geopolitical regional median | 30426.4  |
| MCO | Western Europe            | GDP model                    | 42895.82 |
| MHL | Micronesia                | GDP model                    | 27342.68 |
| MNE | Southern Europe           | GDP model                    | 30382.92 |
| MNP | Micronesia                | GDP model                    | 33060.29 |
| MSR | Caribbean                 | Geopolitical regional median | 30426.4  |
| MTQ | Caribbean                 | Geopolitical regional median | 30426.4  |
| MYT | Eastern Africa            | Geopolitical regional median | 20916.33 |
| NFK | Australia and New Zealand | Geopolitical regional median | 37981.9  |
| NIU | Polynesia                 | Geopolitical regional median | 33284.35 |
| NRU | Micronesia                | GDP model                    | 31687.19 |
| PCN | Polynesia                 | Geopolitical regional median | 33284.35 |
| PLW | Micronesia                | GDP model                    | 32600.77 |
| PNG | Melanesia                 | GDP model                    | 26606.65 |
| PRI | Caribbean                 | GDP model                    | 35759.69 |

|     |                    |                              |          |
|-----|--------------------|------------------------------|----------|
| PSE | Western Asia       | GDP model                    | 27052.4  |
| QAT | Western Asia       | GDP model                    | 40023.45 |
| REU | Eastern Africa     | Geopolitical regional median | 20916.33 |
| RUS | Eastern Europe     | GDP model                    | 33507.29 |
| SDN | Northern Africa    | GDP model                    | 25281.9  |
| SGP | South-Eastern Asia | GDP model                    | 38459.89 |
| SGS | NA                 | Geopolitical regional median | 0        |
| SHN | Western Africa     | Geopolitical regional median | 22869.08 |
| SJM | Northern Europe    | Geopolitical regional median | 39949.25 |
| SMR | Southern Europe    | GDP model                    | 38482.78 |
| SOM | Eastern Africa     | GDP model                    | 17964.8  |
| SPM | Northern America   | Geopolitical regional median | 38306.75 |
| SSD | Northern Africa    | GDP model                    | 24937.06 |
| SXM | Caribbean          | Geopolitical regional median | 30426.4  |
| SYC | Eastern Africa     | GDP model                    | 33192.34 |
| SYR | Western Asia       | Geopolitical regional median | 32537.92 |
| TCA | Caribbean          | GDP model                    | 34627.12 |
| TKL | Polynesia          | Geopolitical regional median | 33284.35 |
| TON | Polynesia          | GDP model                    | 28494.19 |
| TUV | Polynesia          | GDP model                    | 27525.3  |
| UMI | NA                 | Geopolitical regional median | 0        |
| VAT | Southern Europe    | Geopolitical regional median | 38943.68 |
| VGB | Caribbean          | Geopolitical regional median | 30426.4  |
| VIR | Caribbean          | GDP model                    | 36539.19 |
| WLF | Polynesia          | Geopolitical regional median | 33284.35 |
| XAD | NA                 | Geopolitical regional median | 0        |
| XCA | NA                 | Geopolitical regional median | 0        |
| XCL | NA                 | Geopolitical regional median | 0        |

|     |    |                              |   |
|-----|----|------------------------------|---|
| XKO | NA | Geopolitical regional median | 0 |
| XNC | NA | Geopolitical regional median | 0 |
| XPI | NA | Geopolitical regional median | 0 |
| XSP | NA | Geopolitical regional median | 0 |

**S3 Table** Jurisdictions for which protein consumption values were imputed, with source of imputation and resulting values.

| basin_id                                                        | Country     | River or City     | Total N (g) | N (g/m <sup>2</sup> ) | Total N Rank | Total N(g/m <sup>2</sup> ) Rank |
|-----------------------------------------------------------------|-------------|-------------------|-------------|-----------------------|--------------|---------------------------------|
| <b>Top 25 Watersheds Ranked by Total N (g)</b>                  |             |                   |             |                       |              |                                 |
| al_12731                                                        | China       | Yangtze River     | 7.1E+11     | 0.37088357            | 1            | 8384                            |
| al_13237                                                        | Bangladesh  | Meghna River      | 3.62E+11    | 0.22758124            | 2            | 11432                           |
| al_13478                                                        | China       | Shenwan           | 1.89E+11    | 0.41766363            | 3            | 7755                            |
| af_16862                                                        | Egypt       | Nile River        | 1.59E+11    | 0.05261516            | 4            | 23026                           |
| al_11370                                                        | China       | Binzhou           | 1.26E+11    | 0.34718395            | 5            | 8766                            |
| al_11956                                                        | Pakistan    | Keti Bandar       | 1.19E+11    | 0.15777384            | 6            | 14002                           |
| na_75069                                                        | USA         | Mississippi River | 1.01E+11    | 0.03152891            | 7            | 27602                           |
| sa_06694                                                        | Argentina   | Rio Parana        | 9.6E+10     | 0.03640112            | 8            | 26329                           |
| al_09132                                                        | Russia      | Amur River        | 9.04E+10    | 0.04466534            | 9            | 24424                           |
| af_15969                                                        | Niger       | Niger River       | 8.6E+10     | 0.03948781            | 10           | 25580                           |
| eu_30333                                                        | Romania     | Danube River      | 8.45E+10    | 0.10625456            | 11           | 17059                           |
| al_10872                                                        | China       | Tianjin           | 7.66E+10    | 0.73071692            | 12           | 5083                            |
| eu_27295                                                        | Netherlands | Rhine River       | 7.56E+10    | 0.39064582            | 13           | 8098                            |
| al_10213                                                        | China       | Dongli District   | 6.1E+10     | 0.69071214            | 14           | 5320                            |
| al_11575                                                        | China       | Shanghai          | 5.86E+10    | 2.50511331            | 15           | 1564                            |
| af_09315                                                        | Iraq        | Shatt al-Arab     | 5.37E+10    | 0.06126411            | 16           | 21762                           |
| al_11201                                                        | China       | Chenjiagang       | 5.35E+10    | 0.88730868            | 17           | 4295                            |
| al_14328                                                        | India       | Krishna River     | 4.81E+10    | 0.18849689            | 18           | 12668                           |
| al_12164                                                        | India       | Dayapar           | 4.71E+10    | 0.11670111            | 19           | 16314                           |
| al_14070                                                        | India       | Godavari River    | 4.16E+10    | 0.13384341            | 20           | 15259                           |
| af_17918                                                        | DRC         | Congo River       | 4.14E+10    | 0.01115765            | 21           | 36679                           |
| al_09282                                                        | China       | Zhao Quan He      | 3.75E+10    | 0.18380861            | 22           | 12861                           |
| al_14362                                                        | Myanmar     | Pathein           | 3.64E+10    | 0.09281258            | 23           | 18184                           |
| eu_27181                                                        | Ukraine     | Dnieper River     | 3.49E+10    | 0.07073249            | 24           | 20529                           |
| al_11174                                                        | China       | Huanghua          | 3.47E+10    | 0.62451202            | 25           | 5787                            |
| <b>Top 25 Watersheds Ranker by N per Area (g/m<sup>2</sup>)</b> |             |                   |             |                       |              |                                 |
| ai_07771                                                        | China       | Taozi Bay         | 86730972    | 142.5221851           | 3715         | 1                               |

|          |            |                             |          |             |      |    |
|----------|------------|-----------------------------|----------|-------------|------|----|
| al_12918 | China      | Hong Kong                   | 1.54E+09 | 119.9969052 | 374  | 2  |
| al_12913 | China      | Tsing Yi                    | 2.03E+09 | 85.4788765  | 286  | 3  |
| al_12915 | Hong Kong  | Hong Kong                   | 2.39E+09 | 81.39985878 | 257  | 4  |
| eu_30871 | Turkey     | Zeytinburnu/Istanbul        | 2.82E+09 | 68.83582257 | 218  | 5  |
| ai_09953 | China      | Qiantang River              | 40233778 | 66.00517693 | 6094 | 6  |
| al_10759 | China      | Qingdao                     | 1.05E+09 | 61.45810926 | 550  | 7  |
| eu_30851 | Turkey     | Istanbul                    | 7.57E+08 | 61.24758241 | 703  | 8  |
| na_70998 | USA        | New York                    | 1.97E+09 | 56.73549546 | 302  | 9  |
| al_12503 | China      | Xiamen Port                 | 2.82E+09 | 56.33175679 | 220  | 10 |
| ai_07801 | China      | Kongtong Island / Zhifu Bay | 34158623 | 56.13089252 | 6756 | 11 |
| al_15910 | Singapore  | Singapore                   | 6.97E+08 | 54.30275212 | 749  | 12 |
| na_71048 | USA        | Brooklyn                    | 7.66E+08 | 52.46965126 | 695  | 13 |
| na_71080 | USA        | New York                    | 7.32E+08 | 52.30801973 | 720  | 14 |
| al_12911 | Hong Kong  | Hong Kong                   | 30487394 | 49.94564304 | 7203 | 15 |
| na_70978 | USA        | New York                    | 1.51E+09 | 47.01151487 | 380  | 16 |
| al_15872 | Singapore  | Singapore                   | 6.74E+08 | 45.94213325 | 771  | 17 |
| al_10768 | China      | Jiaozhou Wan/Qingdao        | 1.28E+09 | 45.6801241  | 450  | 18 |
| eu_29729 | Spain      | Barcelona                   | 6.96E+08 | 45.4419491  | 750  | 19 |
| al_15899 | Singapore  | Singapore                   | 1.43E+09 | 44.21169406 | 406  | 20 |
| al_15909 | Singapore  | Singapore                   | 8.56E+08 | 41.15963562 | 638  | 21 |
| eu_30892 | Turkey     | Istanbul                    | 4.82E+09 | 41.12931255 | 145  | 22 |
| af_03174 | Turkey     | Istanbul                    | 5.87E+08 | 38.28465088 | 860  | 23 |
| af_18168 | Mozambique | Island of Mozambique        | 32539763 | 37.98566968 | 6942 | 24 |
| al_12903 | Hong Kong  | Hong Kong                   | 6.02E+08 | 37.90202359 | 845  | 25 |

**S4 Table** Top 25 watersheds or coastal urban locations of both N input by total amount (rank) and N input normalized by watershed size (normalized rank).



| <b>ISO3</b> | <b>Country Name</b>   | <b>Direct</b> | <b>Septic</b> | <b>Sewer</b> | <b>Total</b> |
|-------------|-----------------------|---------------|---------------|--------------|--------------|
| ABW         | Aruba                 | 5.65E+05      | 2.27E+06      | 6.05E+07     | 6.33E+07     |
| AFG         | Afghanistan           | 8.71E+09      | 5.55E+08      | 7.11E+08     | 9.97E+09     |
| AGO         | Angola                | 3.18E+09      | 1.06E+09      | 3.22E+09     | 7.47E+09     |
| AIA         | Anguilla              | 7.77E+05      | 2.44E+06      | 3.01E+06     | 6.22E+06     |
| ALA         | Åland Islands         | 2.62E+06      | 1.35E+05      | 3.85E+07     | 4.12E+07     |
| ALB         | Albania               | 1.56E+08      | 2.10E+07      | 4.73E+09     | 4.91E+09     |
| AND         | Andorra               | 5.71E+06      | 1.08E+07      | 1.07E+08     | 1.23E+08     |
| ARE         | United Arab Emirates  | 4.72E+08      | 1.17E+08      | 3.98E+08     | 9.87E+08     |
| ARG         | Argentina             | 5.70E+09      | 1.68E+09      | 3.28E+10     | 4.02E+10     |
| ASM         | American Samoa        | 3.47E+06      | 2.03E+06      | 1.17E+07     | 1.72E+07     |
| ATG         | Antigua & Barbuda     | 4.87E+06      | 3.80E+06      | 3.83E+07     | 4.69E+07     |
| AUS         | Australia             | 6.83E+08      | 5.22E+08      | 1.88E+09     | 3.08E+09     |
| AUT         | Austria               | 5.29E+08      | 2.41E+08      | 1.25E+10     | 1.33E+10     |
| BDI         | Burundi               | 2.95E+09      | 1.53E+08      | 3.50E+08     | 3.46E+09     |
| BEL         | Belgium               | 3.90E+08      | 1.29E+08      | 5.20E+08     | 1.04E+09     |
| BEN         | Benin                 | 4.70E+09      | 6.42E+07      | 2.24E+08     | 4.99E+09     |
| BES         | Caribbean Netherlands | 5.23E+06      | 1.01E+06      | 4.29E+06     | 1.05E+07     |
| BFA         | Burkina Faso          | 1.28E+10      | 1.11E+08      | 4.95E+08     | 1.34E+10     |
| BGD         | Bangladesh            | 8.38E+10      | 5.24E+09      | 1.71E+10     | 1.06E+11     |
| BGR         | Bulgaria              | 3.24E+09      | 4.12E+08      | 5.86E+09     | 9.51E+09     |
| BHR         | Bahrain               | 3.45E+07      | 1.15E+07      | 6.25E+07     | 1.09E+08     |
| BHS         | Bahamas               | 7.80E+06      | 3.39E+07      | 1.67E+08     | 2.08E+08     |
| BIH         | Bosnia & Herzegovina  | 3.42E+08      | 4.16E+08      | 3.53E+09     | 4.29E+09     |
| BLM         | St. Barthélemy        | 1.75E+06      | 1.11E+06      | 2.23E+06     | 5.08E+06     |
| BLR         | Belarus               | 7.67E+08      | 1.23E+08      | 1.17E+10     | 1.26E+10     |

|     |                          |          |          |          |          |
|-----|--------------------------|----------|----------|----------|----------|
| BLZ | Belize                   | 8.33E+07 | 5.07E+07 | 6.40E+07 | 1.98E+08 |
| BMU | Bermuda                  | 3.85E+07 | 1.49E+06 | 1.00E+07 | 5.01E+07 |
| BOL | Bolivia                  | 2.75E+09 | 1.82E+08 | 4.80E+09 | 7.73E+09 |
| BRA | Brazil                   | 6.40E+10 | 7.47E+09 | 1.72E+11 | 2.44E+11 |
| BRB | Barbados                 | 1.89E+08 | 3.09E+06 | 1.22E+07 | 2.04E+08 |
| BRN | Brunei                   | 3.70E+07 | 9.37E+07 | 4.72E+07 | 1.78E+08 |
| BTN | Bhutan                   | 4.45E+08 | 1.02E+08 | 4.23E+07 | 5.89E+08 |
| BWA | Botswana                 | 1.14E+09 | 1.15E+07 | 3.29E+07 | 1.18E+09 |
| CAF | Central African Republic | 1.68E+09 | 4.46E+06 | 2.58E+07 | 1.71E+09 |
| CAN | Canada                   | 2.11E+09 | 9.10E+08 | 2.78E+10 | 3.08E+10 |
| CCK | Cocos (Keeling) Islands  | 6.83E+04 | 1.40E+04 | 2.88E+03 | 8.52E+04 |
| CHE | Switzerland              | 5.54E+08 | 4.88E+07 | 1.14E+10 | 1.21E+10 |
| CHL | Chile                    | 1.18E+09 | 5.16E+08 | 2.01E+10 | 2.18E+10 |
| CHN | China                    | 5.43E+11 | 1.43E+10 | 1.34E+12 | 1.89E+12 |
| CIV | Côte d'Ivoire            | 8.14E+09 | 4.02E+08 | 1.70E+09 | 1.02E+10 |
| CMR | Cameroon                 | 1.51E+10 | 6.56E+08 | 2.24E+08 | 1.59E+10 |
| COD | Congo - Kinshasa         | 3.07E+10 | 6.16E+08 | 6.34E+08 | 3.19E+10 |
| COG | Congo - Brazzaville      | 1.98E+09 | 7.21E+07 | 5.89E+07 | 2.11E+09 |
| COK | Cook Islands             | 4.28E+06 | 3.03E+06 | 2.64E+05 | 7.57E+06 |
| COL | Colombia                 | 3.02E+09 | 1.12E+09 | 3.87E+10 | 4.29E+10 |
| COM | Comoros                  | 7.50E+08 | 1.46E+07 | 5.44E+07 | 8.19E+08 |
| CPV | Cape Verde               | 2.20E+07 | 1.00E+07 | 1.40E+08 | 1.72E+08 |
| CRI | Costa Rica               | 2.97E+08 | 1.17E+09 | 1.29E+09 | 2.76E+09 |
| CUB | Cuba                     | 2.70E+09 | 5.42E+08 | 7.85E+09 | 1.11E+10 |
| CUW | Curaçao                  | 6.83E+05 | 3.70E+06 | 7.99E+07 | 8.43E+07 |
| CXR | Christmas Island         | 4.57E+05 | 9.37E+04 | 7.16E+04 | 6.22E+05 |

|     |                    |          |          |          |          |
|-----|--------------------|----------|----------|----------|----------|
| CYM | Cayman Islands     | 9.03E+06 | 1.00E+07 | 1.89E+07 | 3.80E+07 |
| CYP | Cyprus             | 2.10E+07 | 5.59E+07 | 5.19E+08 | 5.96E+08 |
| CZE | Czechia            | 5.47E+08 | 3.65E+08 | 1.18E+10 | 1.27E+10 |
| DEU | Germany            | 2.80E+09 | 9.04E+08 | 1.03E+11 | 1.06E+11 |
| DJI | Djibouti           | 3.65E+08 | 1.27E+07 | 4.79E+07 | 4.26E+08 |
| DMA | Dominica           | 3.45E+07 | 1.15E+07 | 1.96E+07 | 6.56E+07 |
| DNK | Denmark            | 1.47E+08 | 8.51E+07 | 3.55E+08 | 5.88E+08 |
| DOM | Dominican Republic | 1.55E+09 | 7.76E+08 | 2.28E+09 | 4.60E+09 |
| DZA | Algeria            | 2.05E+09 | 3.56E+08 | 3.54E+10 | 3.78E+10 |
| ECU | Ecuador            | 1.16E+09 | 5.38E+08 | 6.62E+09 | 8.31E+09 |
| EGY | Egypt              | 2.93E+09 | 1.80E+09 | 1.25E+11 | 1.30E+11 |
| ERI | Eritrea            | 1.95E+09 | 4.78E+07 | 2.14E+08 | 2.21E+09 |
| ESH | Western Sahara     | 5.70E+07 | 1.11E+07 | 2.35E+08 | 3.03E+08 |
| ESP | Spain              | 1.46E+09 | 1.03E+08 | 5.27E+10 | 5.42E+10 |
| EST | Estonia            | 1.97E+08 | 1.30E+07 | 1.76E+09 | 1.97E+09 |
| ETH | Ethiopia           | 2.12E+10 | 3.86E+08 | 1.23E+09 | 2.28E+10 |
| FIN | Finland            | 2.57E+09 | 1.33E+07 | 6.18E+09 | 8.76E+09 |
| FJI | Fiji               | 7.79E+08 | 2.63E+07 | 9.31E+07 | 8.98E+08 |
| FLK | Falkland Islands   | 6.29E+03 | 1.89E+04 | 3.18E+06 | 3.20E+06 |
| FRA | France             | 2.16E+09 | 2.57E+09 | 6.62E+09 | 1.14E+10 |
| FRO | Faroe Islands      | 4.57E+06 | 7.46E+06 | 2.96E+07 | 4.16E+07 |
| FSM | Micronesia         | 1.65E+07 | 5.07E+06 | 1.46E+07 | 3.61E+07 |
| GAB | Gabon              | 1.47E+09 | 3.07E+07 | 6.11E+08 | 2.11E+09 |
| GBR | United Kingdom     | 1.61E+09 | 4.31E+08 | 6.61E+10 | 6.82E+10 |
| GEO | Georgia            | 1.10E+09 | 8.92E+06 | 1.03E+09 | 2.14E+09 |
| GGY | Guernsey           | 2.54E+06 | 2.70E+05 | 9.67E+07 | 9.95E+07 |

|     |                     |          |          |          |          |
|-----|---------------------|----------|----------|----------|----------|
| GHA | Ghana               | 1.22E+10 | 6.34E+08 | 1.27E+09 | 1.41E+10 |
| GIB | Gibraltar           | 2.23E+06 | 1.51E+06 | 5.73E+07 | 6.10E+07 |
| GIN | Guinea              | 7.38E+09 | 2.70E+08 | 3.34E+08 | 7.99E+09 |
| GLP | Guadeloupe          | 6.71E+07 | 4.25E+07 | 9.93E+07 | 2.09E+08 |
| GMB | Gambia              | 6.14E+08 | 3.07E+07 | 6.30E+07 | 7.08E+08 |
| GNB | Guinea-Bissau       | 4.25E+08 | 1.89E+07 | 4.90E+07 | 4.92E+08 |
| GNQ | Equatorial Guinea   | 1.41E+09 | 2.14E+07 | 1.44E+08 | 1.58E+09 |
| GRC | Greece              | 4.09E+08 | 7.07E+08 | 1.30E+10 | 1.42E+10 |
| GRD | Grenada             | 3.25E+07 | 1.11E+07 | 2.88E+07 | 7.24E+07 |
| GRL | Greenland           | 2.03E+06 | 1.17E+06 | 2.49E+06 | 5.70E+06 |
| GTM | Guatemala           | 6.04E+09 | 3.76E+08 | 9.25E+09 | 1.57E+10 |
| GUF | French Guiana       | 6.95E+07 | 3.10E+07 | 5.80E+07 | 1.58E+08 |
| GUM | Guam                | 9.42E+06 | 1.30E+07 | 2.92E+07 | 5.16E+07 |
| GUY | Guyana              | 1.97E+08 | 1.29E+08 | 5.06E+07 | 3.77E+08 |
| HKG | Hong Kong SAR China | 1.27E+09 | 9.10E+07 | 1.29E+10 | 1.43E+10 |
| HND | Honduras            | 2.84E+09 | 3.96E+08 | 3.11E+09 | 6.34E+09 |
| HRV | Croatia             | 2.90E+08 | 3.31E+08 | 3.15E+09 | 3.77E+09 |
| HTI | Haiti               | 6.23E+09 | 2.70E+08 | 9.59E+07 | 6.60E+09 |
| HUN | Hungary             | 2.24E+09 | 2.95E+08 | 8.57E+09 | 1.11E+10 |
| IDN | Indonesia           | 4.59E+10 | 4.07E+10 | 2.44E+10 | 1.11E+11 |
| IMN | Isle of Man         | 1.43E+07 | 1.73E+06 | 1.26E+08 | 1.42E+08 |
| IND | India               | 3.24E+11 | 6.92E+10 | 2.66E+11 | 6.59E+11 |
| IRL | Ireland             | 6.47E+08 | 4.50E+08 | 4.32E+09 | 5.42E+09 |
| IRN | Iran                | 1.52E+10 | 5.58E+07 | 6.65E+09 | 2.19E+10 |
| IRQ | Iraq                | 4.81E+09 | 2.55E+09 | 1.05E+10 | 1.79E+10 |
| ISL | Iceland             | 1.54E+07 | 7.20E+06 | 1.97E+07 | 4.23E+07 |

|     |                            |          |          |          |          |
|-----|----------------------------|----------|----------|----------|----------|
| ISR | Israel                     | 2.01E+08 | 2.67E+07 | 1.42E+10 | 1.44E+10 |
| ITA | Italy                      | 5.93E+09 | 4.11E+09 | 9.11E+10 | 1.01E+11 |
| JAM | Jamaica                    | 1.17E+09 | 1.50E+08 | 9.51E+08 | 2.27E+09 |
| JEY | Jersey                     | 5.19E+06 | 4.68E+05 | 1.48E+08 | 1.54E+08 |
| JOR | Jordan                     | 5.51E+06 | 1.17E+07 | 1.10E+08 | 1.27E+08 |
| JPN | Japan                      | 1.43E+10 | 7.83E+09 | 1.48E+10 | 3.69E+10 |
| KAZ | Kazakhstan                 | 2.54E+09 | 8.04E+07 | 3.54E+09 | 6.16E+09 |
| KEN | Kenya                      | 2.05E+10 | 3.06E+08 | 4.43E+09 | 2.52E+10 |
| KHM | Cambodia                   | 3.69E+09 | 1.22E+09 | 3.80E+09 | 8.72E+09 |
| KIR | Kiribati                   | 5.49E+07 | 5.37E+06 | 1.37E+07 | 7.40E+07 |
| KNA | St. Kitts & Nevis          | 1.32E+07 | 2.83E+06 | 5.38E+06 | 2.15E+07 |
| KOR | South Korea                | 3.18E+09 | 1.31E+08 | 2.77E+08 | 3.59E+09 |
| KWT | Kuwait                     | 1.05E+08 | 8.36E+07 | 4.28E+09 | 4.47E+09 |
| LAO | Laos                       | 7.41E+09 | 3.07E+08 | 1.07E+08 | 7.83E+09 |
| LBN | Lebanon                    | 1.07E+09 | 1.03E+07 | 4.24E+07 | 1.13E+09 |
| LBR | Liberia                    | 2.22E+09 | 9.81E+07 | 3.74E+07 | 2.36E+09 |
| LBY | Libya                      | 1.22E+09 | 8.10E+07 | 2.72E+08 | 1.58E+09 |
| LCA | St. Lucia                  | 2.53E+07 | 3.69E+07 | 2.03E+07 | 8.25E+07 |
| LIE | Liechtenstein              | 2.88E+06 | 2.20E+05 | 1.89E+07 | 2.20E+07 |
| LKA | Sri Lanka                  | 1.45E+10 | 1.22E+08 | 1.26E+09 | 1.59E+10 |
| LSO | Lesotho                    | 1.64E+09 | 8.41E+06 | 6.65E+07 | 1.72E+09 |
| LTU | Lithuania                  | 3.89E+08 | 4.42E+07 | 5.01E+09 | 5.44E+09 |
| LUX | Luxembourg                 | 3.31E+07 | 1.42E+07 | 9.13E+08 | 9.60E+08 |
| LVA | Latvia                     | 2.28E+08 | 1.22E+07 | 2.41E+09 | 2.65E+09 |
| MAC | Macao SAR China            | 4.45E+07 | 1.35E+06 | 6.48E+08 | 6.94E+08 |
| MAF | Saint Martin (French part) | 2.41E+06 | 1.24E+06 | 1.01E+07 | 1.37E+07 |

|     |                          |          |          |          |          |
|-----|--------------------------|----------|----------|----------|----------|
| MAR | Morocco                  | 6.47E+09 | 1.71E+09 | 3.16E+10 | 3.97E+10 |
| MCO | Monaco                   | 1.18E+06 | 5.36E+05 | 6.86E+07 | 7.03E+07 |
| MDA | Moldova                  | 2.06E+09 | 7.21E+07 | 1.89E+09 | 4.03E+09 |
| MDG | Madagascar               | 1.62E+10 | 2.93E+08 | 2.76E+08 | 1.67E+10 |
| MDV | Maldives                 | 2.92E+07 | 2.49E+07 | 8.90E+07 | 1.43E+08 |
| MEX | Mexico                   | 1.18E+10 | 4.33E+09 | 1.20E+11 | 1.37E+11 |
| MHL | Marshall Islands         | 1.31E+07 | 4.72E+06 | 1.10E+07 | 2.88E+07 |
| MKD | North Macedonia          | 3.25E+08 | 4.95E+07 | 2.01E+09 | 2.39E+09 |
| MLI | Mali                     | 1.63E+10 | 1.69E+08 | 5.46E+08 | 1.70E+10 |
| MLT | Malta                    | 1.07E+07 | 1.04E+06 | 6.84E+08 | 6.96E+08 |
| MMR | Myanmar (Burma)          | 5.93E+10 | 2.26E+09 | 7.43E+08 | 6.23E+10 |
| MNE | Montenegro               | 5.34E+07 | 9.88E+07 | 3.69E+08 | 5.21E+08 |
| MNG | Mongolia                 | 2.22E+09 | 5.88E+06 | 6.47E+08 | 2.87E+09 |
| MNP | Northern Mariana Islands | 1.97E+06 | 3.79E+06 | 1.49E+07 | 2.06E+07 |
| MOZ | Mozambique               | 9.45E+09 | 2.65E+08 | 4.61E+08 | 1.02E+10 |
| MRT | Mauritania               | 2.91E+09 | 1.58E+08 | 1.88E+08 | 3.25E+09 |
| MSR | Montserrat               | 1.63E+05 | 4.27E+04 | 2.08E+06 | 2.28E+06 |
| MTQ | Martinique               | 1.90E+07 | 4.99E+07 | 1.13E+08 | 1.81E+08 |
| MUS | Mauritius                | 6.48E+07 | 1.18E+06 | 6.93E+08 | 7.59E+08 |
| MWI | Malawi                   | 1.02E+10 | 7.39E+07 | 3.78E+08 | 1.07E+10 |
| MYS | Malaysia                 | 1.27E+09 | 1.99E+09 | 3.84E+09 | 7.10E+09 |
| MYT | Mayotte                  | 1.04E+08 | 1.55E+07 | 2.86E+07 | 1.48E+08 |
| NAM | Namibia                  | 4.34E+08 | 4.29E+06 | 4.43E+08 | 8.81E+08 |
| NCL | New Caledonia            | 1.45E+08 | 1.17E+07 | 4.24E+07 | 1.99E+08 |
| NER | Niger                    | 1.61E+10 | 2.60E+08 | 4.63E+08 | 1.68E+10 |
| NFK | Norfolk Island           | 3.75E+05 | 3.75E+05 | 3.75E+06 | 4.50E+06 |

|     |                         |          |          |          |          |
|-----|-------------------------|----------|----------|----------|----------|
| NGA | Nigeria                 | 6.86E+10 | 4.87E+09 | 1.86E+10 | 9.21E+10 |
| NIC | Nicaragua               | 3.59E+09 | 1.76E+08 | 2.14E+09 | 5.91E+09 |
| NIU | Niue                    | 2.33E+04 | 2.28E+04 | 7.60E+05 | 8.06E+05 |
| NLD | Netherlands             | 3.27E+08 | 3.77E+07 | 1.74E+10 | 1.78E+10 |
| NOR | Norway                  | 3.31E+08 | 2.34E+08 | 5.32E+08 | 1.10E+09 |
| NPL | Nepal                   | 1.37E+10 | 3.37E+09 | 3.54E+09 | 2.06E+10 |
| NRU | Nauru                   | 8.67E+06 | 1.06E+06 | 2.46E+06 | 1.22E+07 |
| NZL | New Zealand             | 3.83E+08 | 1.63E+08 | 3.72E+08 | 9.18E+08 |
| OMN | Oman                    | 3.65E+08 | 9.21E+08 | 5.68E+08 | 1.85E+09 |
| PAK | Pakistan                | 3.95E+10 | 5.95E+09 | 8.11E+10 | 1.27E+11 |
| PAN | Panama                  | 1.30E+09 | 3.28E+08 | 1.71E+09 | 3.34E+09 |
| PCN | Pitcairn Islands        | 2.79E+04 | 1.88E+04 | 1.81E+03 | 4.85E+04 |
| PER | Peru                    | 8.30E+09 | 4.99E+08 | 2.30E+10 | 3.18E+10 |
| PHL | Philippines             | 1.85E+10 | 1.56E+10 | 4.00E+09 | 3.80E+10 |
| PLW | Palau                   | 3.72E+05 | 2.18E+06 | 8.69E+06 | 1.12E+07 |
| PNG | Papua New Guinea        | 6.23E+09 | 4.24E+08 | 1.53E+09 | 8.18E+09 |
| POL | Poland                  | 2.91E+09 | 2.08E+09 | 6.13E+09 | 1.11E+10 |
| PRI | Puerto Rico             | 2.57E+08 | 4.00E+08 | 8.62E+08 | 1.52E+09 |
| PRK | North Korea             | 1.29E+10 | 4.83E+08 | 1.34E+10 | 2.68E+10 |
| PRT | Portugal                | 7.95E+08 | 5.98E+08 | 1.06E+10 | 1.20E+10 |
| PRY | Paraguay                | 1.29E+09 | 2.49E+08 | 8.87E+08 | 2.43E+09 |
| PSE | Palestinian Territories | 1.64E+08 | 1.32E+08 | 2.99E+09 | 3.28E+09 |
| PYF | French Polynesia        | 3.92E+07 | 4.45E+07 | 1.15E+08 | 1.99E+08 |
| QAT | Qatar                   | 5.03E+07 | 4.11E+07 | 2.00E+08 | 2.91E+08 |
| REU | Réunion                 | 5.09E+06 | 9.71E+06 | 1.41E+08 | 1.56E+08 |
| ROU | Romania                 | 1.58E+10 | 1.18E+08 | 3.43E+08 | 1.63E+10 |

|     |                       |          |          |          |          |
|-----|-----------------------|----------|----------|----------|----------|
| RUS | Russia                | 1.90E+10 | 5.06E+08 | 7.37E+10 | 9.33E+10 |
| RWA | Rwanda                | 5.06E+09 | 2.53E+07 | 4.17E+08 | 5.50E+09 |
| SAU | Saudi Arabia          | 4.40E+08 | 1.36E+09 | 4.50E+09 | 6.30E+09 |
| SDN | Sudan                 | 2.24E+10 | 6.80E+08 | 8.75E+08 | 2.39E+10 |
| SEN | Senegal               | 3.82E+09 | 5.80E+08 | 1.85E+09 | 6.25E+09 |
| SGP | Singapore             | 2.30E+08 | 9.48E+08 | 8.72E+09 | 9.89E+09 |
| SHN | St. Helena            | 1.37E+04 | 4.35E+04 | 7.52E+05 | 8.10E+05 |
| SJM | Svalbard & Jan Mayen  | 5.23E+05 | 6.40E+04 | 3.37E+06 | 3.96E+06 |
| SLB | Solomon Islands       | 3.98E+08 | 1.05E+07 | 2.62E+07 | 4.35E+08 |
| SLE | Sierra Leone          | 6.18E+09 | 7.41E+07 | 5.87E+07 | 6.31E+09 |
| SLV | El Salvador           | 2.86E+09 | 2.32E+08 | 3.05E+09 | 6.13E+09 |
| SMR | San Marino            | 1.06E+06 | 1.09E+06 | 7.24E+06 | 9.39E+06 |
| SOM | Somalia               | 5.75E+09 | 8.02E+07 | 1.35E+09 | 7.17E+09 |
| SPM | St. Pierre & Miquelon | 5.45E+04 | 1.42E+05 | 7.76E+06 | 7.95E+06 |
| SRB | Serbia                | 4.73E+08 | 5.49E+08 | 5.25E+09 | 6.27E+09 |
| SSD | South Sudan           | 8.20E+09 | 2.57E+08 | 1.27E+08 | 8.58E+09 |
| STP | São Tomé & Príncipe   | 1.26E+08 | 9.00E+05 | 1.68E+07 | 1.44E+08 |
| SUR | Suriname              | 8.53E+07 | 8.87E+07 | 1.07E+07 | 1.85E+08 |
| SVK | Slovakia              | 4.35E+08 | 3.79E+08 | 4.09E+09 | 4.90E+09 |
| SVN | Slovenia              | 4.72E+08 | 2.34E+08 | 4.81E+08 | 1.19E+09 |
| SWE | Sweden                | 4.33E+08 | 3.70E+08 | 1.29E+10 | 1.37E+10 |
| SWZ | Eswatini              | 9.11E+08 | 1.13E+07 | 1.54E+08 | 1.08E+09 |



|     |                        |          |          |          |          |
|-----|------------------------|----------|----------|----------|----------|
| SXM | Sint Maarten           | 1.42E+07 | 2.95E+06 | 9.98E+06 | 2.71E+07 |
| SYC | Seychelles             | 1.26E+06 | 6.89E+06 | 3.69E+07 | 4.51E+07 |
| SYR | Syria                  | 2.16E+09 | 1.17E+08 | 1.34E+10 | 1.57E+10 |
| TCA | Turks & Caicos Islands | 3.33E+06 | 1.39E+06 | 1.28E+07 | 1.75E+07 |
| TCD | Chad                   | 7.72E+08 | 5.87E+06 | 2.43E+07 | 8.02E+08 |
| TGO | Togo                   | 2.45E+09 | 1.63E+08 | 7.13E+07 | 2.69E+09 |
| THA | Thailand               | 2.83E+09 | 9.51E+09 | 5.35E+09 | 1.77E+10 |
| TKL | Tokelau                | 2.05E+05 | 1.38E+05 | 6.49E+03 | 3.49E+05 |
| TLS | Timor-Leste            | 7.06E+08 | 4.22E+07 | 1.20E+08 | 8.68E+08 |
| TON | Tonga                  | 6.30E+06 | 6.18E+06 | 1.20E+06 | 1.37E+07 |
| TTO | Trinidad & Tobago      | 1.18E+08 | 2.19E+08 | 5.51E+08 | 8.88E+08 |
| TUN | Tunisia                | 1.28E+09 | 3.49E+08 | 9.73E+09 | 1.14E+10 |
| TUR | Turkey                 | 5.42E+09 | 2.42E+09 | 9.99E+10 | 1.08E+11 |
| TUV | Tuvalu                 | 9.51E+05 | 1.24E+05 | 1.50E+06 | 2.58E+06 |
| TWN | Taiwan                 | 9.80E+09 | 2.57E+08 | 2.33E+10 | 3.33E+10 |
| TZA | Tanzania               | 1.91E+10 | 4.56E+08 | 7.81E+08 | 2.03E+10 |
| UGA | Uganda                 | 1.18E+10 | 1.34E+08 | 6.16E+08 | 1.26E+10 |
| UKR | Ukraine                | 2.48E+10 | 1.58E+08 | 3.02E+10 | 5.52E+10 |

|     |                          |          |          |          |          |
|-----|--------------------------|----------|----------|----------|----------|
| URY | Uruguay                  | 1.15E+08 | 1.64E+08 | 2.52E+09 | 2.80E+09 |
| USA | United States            | 8.80E+09 | 1.49E+10 | 3.34E+11 | 3.58E+11 |
| VAT | Vatican City             | 1.28E+06 | 4.51E+05 | 6.58E+07 | 6.75E+07 |
| VCT | St. Vincent & Grenadines | 3.69E+07 | 1.89E+07 | 4.12E+07 | 9.71E+07 |
| VEN | Venezuela                | 1.68E+09 | 3.31E+08 | 1.01E+09 | 3.01E+09 |
| VGB | British Virgin Islands   | 1.52E+06 | 3.91E+06 | 1.15E+07 | 1.69E+07 |
| VIR | U.S. Virgin Islands      | 2.31E+06 | 8.66E+06 | 3.92E+07 | 5.01E+07 |
| VNM | Vietnam                  | 1.53E+10 | 1.67E+10 | 2.21E+09 | 3.42E+10 |
| VUT | Vanuatu                  | 1.53E+08 | 1.06E+07 | 2.92E+07 | 1.93E+08 |
| WLF | Wallis & Futuna          | 2.37E+05 | 1.60E+05 | 1.76E+05 | 5.72E+05 |
| WSM | Samoa                    | 1.04E+07 | 1.55E+07 | 2.29E+06 | 2.82E+07 |
| YEM | Yemen                    | 3.03E+09 | 5.66E+08 | 9.77E+09 | 1.34E+10 |
| ZAF | South Africa             | 1.48E+10 | 2.19E+08 | 4.25E+10 | 5.75E+10 |
| ZMB | Zambia                   | 6.48E+09 | 1.38E+08 | 2.24E+09 | 8.86E+09 |
| ZWE | Zimbabwe                 | 4.85E+09 | 1.24E+08 | 5.65E+09 | 1.06E+10 |

**S5 Table** Values calculated and used in Fig. 2 of the main text for wastewater N input levels into EEZs around the world.

[1] Mayorga E, Seitzinger S P, Harrison J A, Dumont E, Beusen A H W, Bouwman A F, Fekete B M, Kroeze C and Van Drecht G 2010 Global Nutrient Export from WaterSheds 2 (NEWS 2): Model development and implementation *Environmental Modelling & Software* **25** 837–53
